# Supplementary material
Source: PubMed Central journal article supplement (PMC385408)
Supplement: jcinvest_113_8_1168__1.pdf [file jcinvest_113_8_1168__1.pdf]

**Supplemental Table 1**

Effects of feeding various amounts of cholesterol (0.02 to 0.05%) to wild type and TgInsig-1 mice

| Parameter                            | Wild type   |             |             |             | TgInsig-1    |              |             |             |
|--------------------------------------|-------------|-------------|-------------|-------------|--------------|--------------|-------------|-------------|
|                                      | 0.02%       | 0.05%       | 0.15%       | 0.5%        | 0.02%        | 0.05%        | 0.15%       | 0.5%        |
| Body weight (g)                      | 20.5 ± 0.6  | 20.4 ± 0.8  | 20.2 ± 0.4  | 20.4 ± 0.9  | 19.5 ± 0.2   | 19.7 ± 0.3   | 19.4 ± 0.4  | 19.4 ± 0.3  |
| Liver weight (g)                     | 1.2 ± 0.03  | 1.2 ± 0.03  | 1.3 ± 0.02  | 1.2 ± 0.04  | 1.1 ± 0.05   | 1.1 ± 0.03   | 1.2 ± 0.05  | 1.2 ± 0.02  |
| Liver cholesterol content (mg/100g)  | 2.3 ± 0.05  | 2.7 ± 0.15  | 2.8 ± 0.1   | 4.5 ± 0.2   | 1.9 ± 0.05** | 1.9 ± 0.05** | 2.3 ± 0.1*  | 3.8 ± 0.3   |
| Liver triglyceride content (mg/100g) | 7.2 ± 1.6   | 6.9 ± 1.5   | 8.6 ± 0.6   | 10.1 ± 1.4  | 5.0 ± 0.2    | 4.9 ± 1.1    | 3.4 ± 0.1** | 7.8 ± 0.8   |
| Total plasma cholesterol (mg/dl)     | 70 ± 5      | 72 ± 2      | 81 ± 2      | 94 ± 6      | 49 ± 4*      | 46 ± 3**     | 42 ± 4**    | 67 ± 8*     |
| Total plasma triglycerides (mg/dl)   | 131 ± 23    | 104 ± 9     | 85 ± 6      | 67 ± 8      | 107 ± 18     | 71 ± 8       | 92 ± 16     | 66 ± 2      |
| Plasma insulin (ng/ml)               | 0.53 ± 0.02 | 0.50 ± 0.04 | 0.50 ± 0.19 | 0.55 ± 0.09 | 0.43 ± 0.11  | 0.46 ± 0.02  | 0.62 ± 0.08 | 0.51 ± 0.05 |
| Plasma glucose (mg/dl)               | 205 ± 9     | 193 ± 10    | 190 ± 8     | 190 ± 1     | 184 ± 8      | 182 ± 16     | 213 ± 7     | 200 ± 4     |
| Plasma free fatty acids (mM)         | 0.61 ± 0.08 | 0.62 ± 0.1  | 0.66 ± 0.09 | 0.47 ± 0.07 | 0.52 ± 0.04  | 0.44 ± 0.05  | 0.49 ± 0.04 | 0.54 ± 0.02 |

8-week old female mice (4 per group) were fed an ad libitum chow diet supplemented with the indicated amount of cholesterol for 2 days prior to study. The wild type mice were littermates of the transgenic mice. Each value represents the mean ± SEM of 4 mice. Asterisks denote the level of statistical significance (Student's *t* test) between the wild type and TgInsig-1 groups. \*, *p*< 0.05; \*\*, *p*< 0.01.
