# Supplementary material
Source: PubMed Central journal article supplement (PMC385408)
Supplement: jcinvest_113_8_1168__2.pdf [file jcinvest_113_8_1168__2.pdf]

**Supplemental Table 2**

Effects of fasting and refeeding in wild type and TgInsig-1 mice

| Parameter                       | Wild type   |             |             | TgInsig-1   |             |                |
|---------------------------------|-------------|-------------|-------------|-------------|-------------|----------------|
|                                 | Nonfasted   | Fasted      | Refed       | Nonfasted   | Fasted      | Refed          |
| Body Weight (g)                 | 28.8 ± 0.2  | 26.7 ± 0.8  | 28.1 ± 0.9  | 27.0 ± 1.1  | 23.9 ± 0.5* | 27.4 ± 1.2     |
| Liver Weight (g)                | 1.5 ± 0.1   | 1.2 ± 0.1   | 2.2 ± 0.0   | 1.5 ± 0.1   | 1.0 ± 0.0*  | 2.0 ± 0.1      |
| Liver cholesterol content (mg/  | 2.4 ± 0.1   | 3.4 ± 0.3   | 1.6 ± 0.1   | 2.0 ± 0.1** | 2.6 ± 0.1*  | 1.4 ± 0.1*     |
| Liver triglyceride content (mg/ | 5.4 ± 0.6   | 41 ± 7      | 4.5 ± 0.3   | 2.6 ± 0.1** | 20 ± 13     | 2.0 ± 0.3**    |
| Total plasma cholesterol (mg/   | 100 ± 7     | 119 ± 6     | 90 ± 8      | 69 ± 4**    | 70 ± 5**    | 47 ± 3**       |
| Total plasma triglycerides (mc  | 70 ± 7      | 57 ± 9      | 293 ± 25    | 64 ± 5      | 38 ± 11     | 60 ± 14**      |
| Plasma insulin (ng/ml)          | 0.87 ± 0.1  | 0.13 ± 0.02 | 3.5 ± 0.78  | 0.57 ± 0.05 | 0.22 ± 0.04 | 1.9 ± 0.36     |
| Plasma glucose (mg/dl)          | 222 ± 16    | 133 ± 14    | 213 ± 20    | 195 ± 13    | 128 ± 20    | 187 ± 16       |
| Plasma free fatty acids (mM)    | 0.35 ± 0.02 | 0.78 ± 0.13 | 0.24 ± 0.02 | 0.34 ± 0.02 | 0.73 ± 0.02 | 0.12 ± 0.02 ** |

16-week old male mice (5 per group) were subjected to fasting and refeeding as described in Methods. The wild type mice were littermates of the transgenic mice. Each value represents the mean ± SEM of 5 mice. Asterisks denote the level of statistical significance (Student's *t* test) between the wild type and TgInsig-1 groups. \*,  $p < 0.05$ ; \*\*,  $p < 0.01$ .
